# Supplementary material for: Postoperative Structural Brain Changes and Cognitive Dysfunction in Patients with Breast Cancer
Source: PubMed Central journal article supplement (PMC4633203; doi:10.1371/journal.pone.0140655), 2015-11-04
Supplement: pone.0140655.s003.pdf [file pone.0140655.s003.pdf]

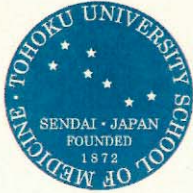

# Certificate of Approval

Ethics Committee

Tohoku University Graduate School of Medicine

The following protocol was approved:

Title of Protocol

Neurological underpinnings of cognitive dysfunctions in breast cancer patients

Protocol Identification Number

2014-1-826

Principal Investigator

Ryuta Kawashima

Period of Research

April, 2011 ~ March, 2016

Comments

Name : Tooru Shimosegawa

Title : Dean, Tohoku University Graduate School of Medicine

Tooru Shimosegawa

Signature

April 20, 2015

Date

Name : Atsushi Asai

Title : Chair

Ethics Committee of Tohoku University Graduate School of Medicine

Atsushi Asai

Signature

April 20, 2015

Date
